# Supplementary figures and images for: Generation of a competing endogenous RNA network and validation of BNIP1 expression in the lung of irradiated mice
Source: PubMed Central journal article supplement — Transl Oncol. 2024 Jun 20;47:102007. doi: 10.1016/j.tranon.2024.102007 (PMC11245936; doi:10.1016/j.tranon.2024.102007), 2024-06-20

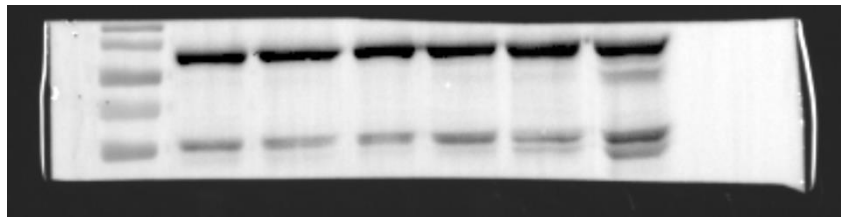

Con 3h 6h 12h 24h waste  
a-Actinin

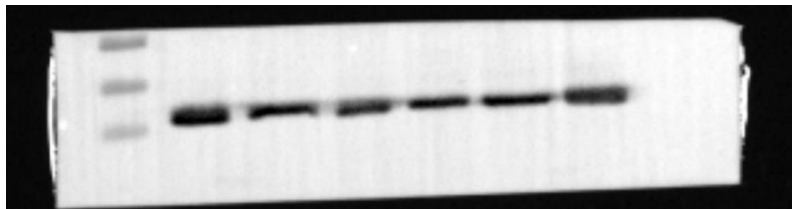

Con 3h 6h 12h 24h waste  
BNIP1

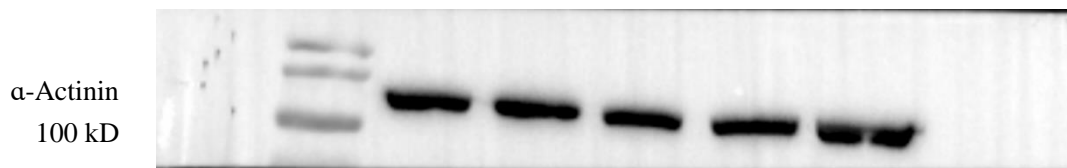

α-Actinin  
100 kD

Con 24h 48h 72h waste

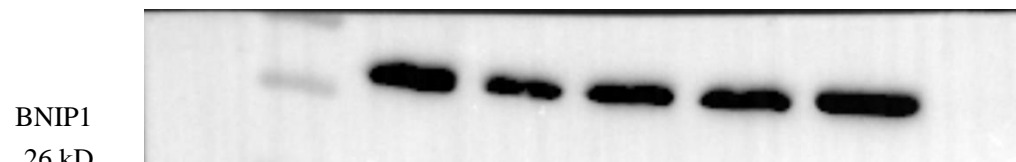

BNIP1  
26 kD

Con 24h 48h 72h waste

Supplement: mmc1.pdf [file mmc1.pdf]
